# Supplementary figures and images for: A Novel Mouse Model for Investigating the Effects of Gender-affirming Hormone Therapy on Surgical Healing
Source: PubMed Central journal article supplement — Plast Reconstr Surg Glob Open. 2022 Nov 29;10(11):e4688. doi: 10.1097/GOX.0000000000004688 (PMC9708152; doi:10.1097/gox.0000000000004688), 2022-11-29

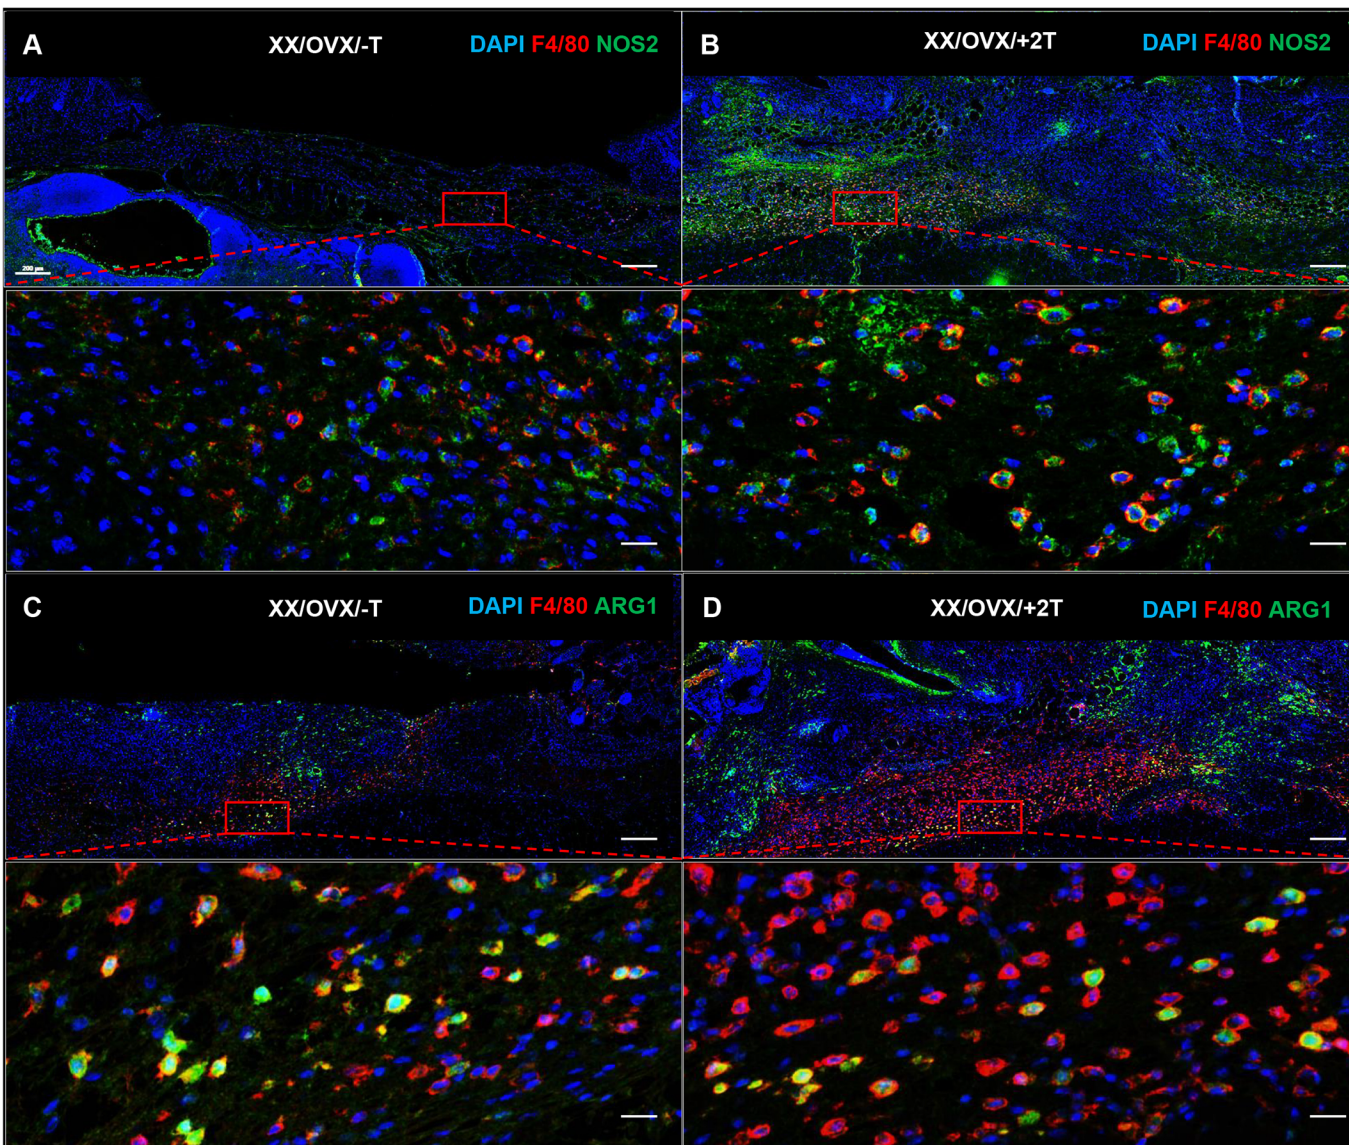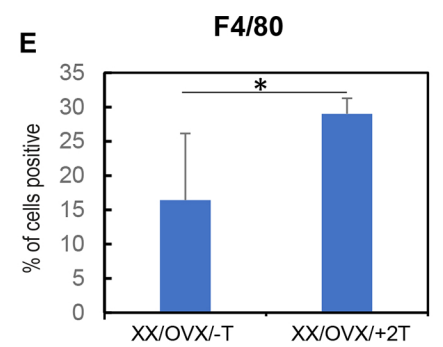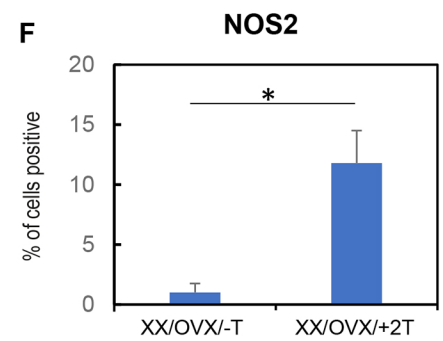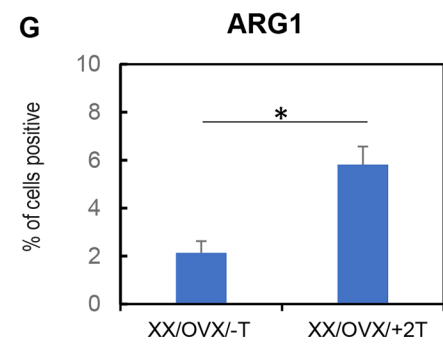

Supplement: gox-10-e4688-s002.pdf [file gox-10-e4688-s002.pdf]
